# Supplementary material for: A self-assembling CXCR4-targeted pyroptosis nanotoxin for melanoma therapy
Source: Royal Society of Chemistry journal article supplement (doi:10.1039/d2bm02026b), 2023-01-01
Supplement: d2bm02026b1.pdf [file d2bm02026b1.pdf]

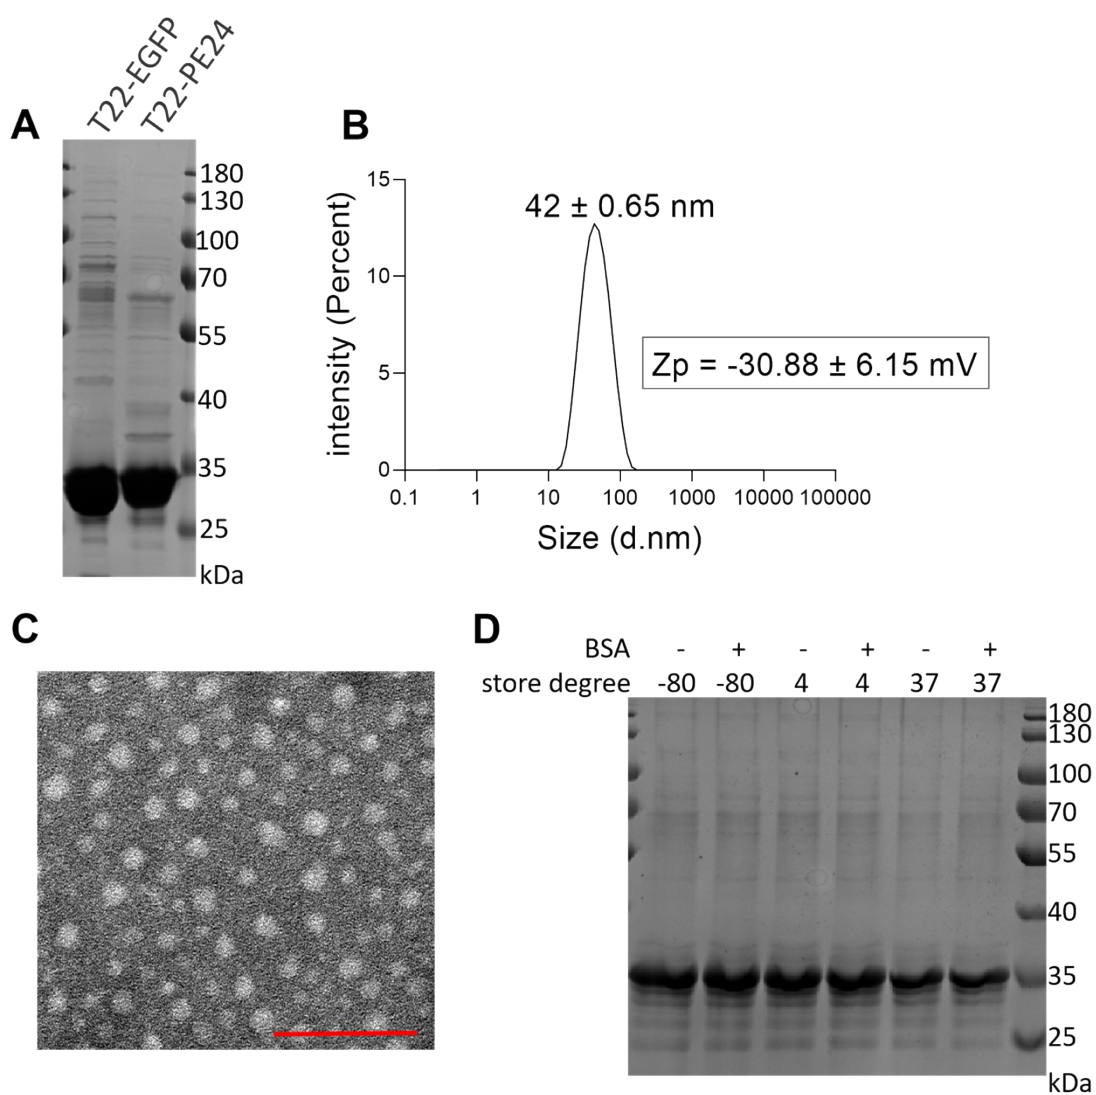

**Supplemental fig. 1.** (A) Coomassia blue stain bands of T22-EGFP and T22-PE24. (B) Size and potential of T22-PE24 nanoparticles determined by DLS. (C) Representative image of T22-PE24 under the field emission scanning electron microscope (FESEM). Bar scale: 100  $\mu\text{m}$ . (D) The stability of T22-PE24 in stored buffer with or without 5 % BSA at -80  $^{\circ}\text{C}$ , 4  $^{\circ}\text{C}$  or 37  $^{\circ}\text{C}$  for 30 days.

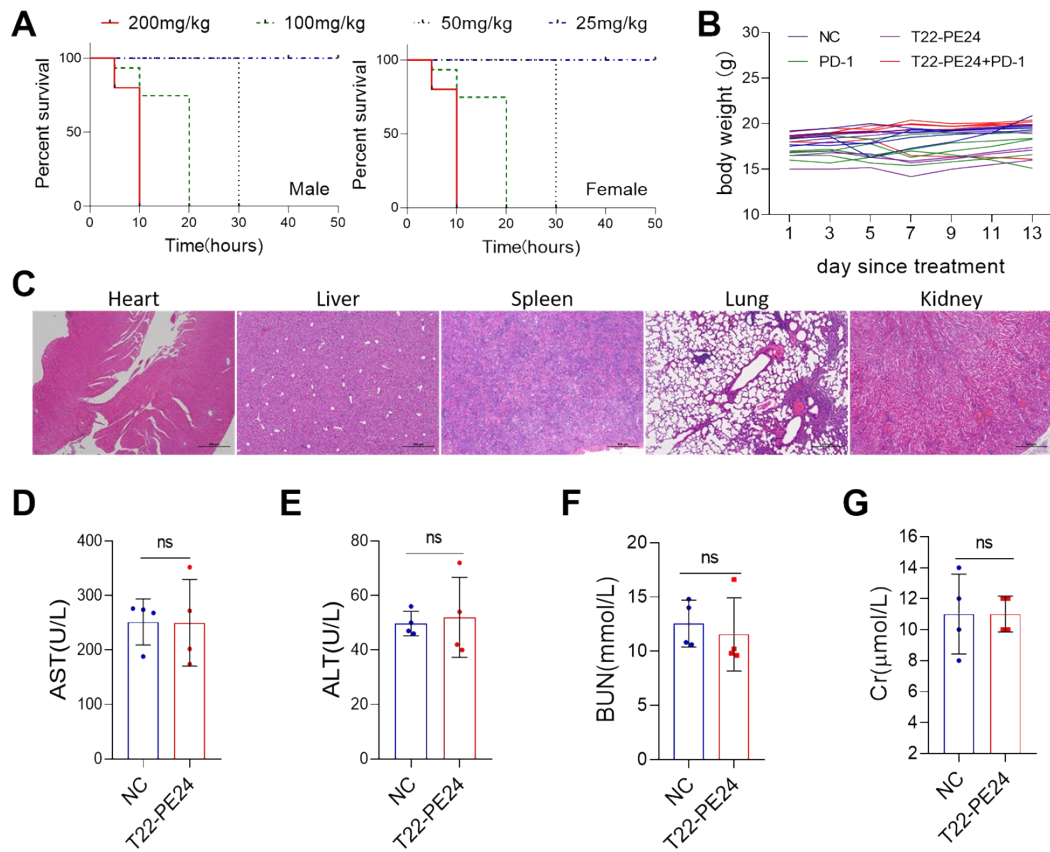

**Supplemental fig. 2.** (A) Animal survival curves (log-rank test;  $p < 0.0001$  for 25mg/kg versus 50 mg/kg). (B) Average body weight of mice as indicated. (C) H&E stain of mouse tissue in 100  $\mu\text{g}$ -T22-PE24-treated group. (D-F) AST, ALT, BUN and Cr analysis from mice with or without 100  $\mu\text{g}$  T22-PE24 treatment.
